# Supplementary material
Source: PubMed Central journal article supplement (PMC3919634)
Supplement: NIHMS537456-supplement-1.pdf [file NIHMS537456-supplement-1.pdf]

### Supplemental Methods. Antibodies for immunohistochemical analysis

| Primary antibody | ID#      | Dilution | Manufacturer                     |
|------------------|----------|----------|----------------------------------|
| keratin wide     | Z622     | 1:1000   | Dako Japan, Tokyo, Japan         |
| vimentin         | SP20     | 1:100    | Nichirei, Tokyo, Japan           |
| $\alpha$ SMA     | Ab5694   | 1:1000   | Abcam, MA                        |
| Ki-67            | ab66155  | 1:1000   | Abcam, MA                        |
| ER               | sc-542   | 1:1000   | Santa Cruz, CA                   |
| PR               | sc-538   | 1:1000   | Santa Cruz, CA                   |
| Pdx1             | N/A      | 1:5000   | Gift of Chris Wright, Vanderbilt |
| Hes1             | D6P2U    | 1:500    | Cell Signaling Technology, MA    |
| $\beta$ -catenin | #9562    | 1:500    | Cell Signaling Technology, MA    |
| Axin2            | ab32197  | 1:1,000  | Abcam, MA                        |
| Wnt1             | Ab15251  | 1:1000   | Abcam, MA                        |
| FZD1             | BAM11201 | 1:10     | R&D systems, MN                  |
| FZD3             | Ab75233  | 1:500    | Abcam, MA                        |
| FZD4             | 07-746   | 1:50     | Millipore, MA                    |
| FZD6             | sc-32148 | 1:250    | Santa Cruz, CA                   |
| NFACc1           | sc-7294  | 1:50     | Santa Cruz, CA                   |
| p-Rock2          | Ab83514  | 1:500    | Cell Signaling Technology, MA    |
| p-JNK            | #9251    | 1:50     | Cell Signaling Technology, MA    |
| p-Smad2/3        | #3101    | 1:500    | Cell Signaling Technology, MA    |
| Smad4            | sc-7966  | 1:50     | Santa Cruz, CA                   |
| p-Akt (ser 473)  | #4060    | 1:400    | Cell Signaling Technology, MA    |
| p-Erk1/2         | #9101    | 1:500    | Cell Signaling Technology, MA    |
