# Supplementary material
Source: PubMed Central journal article supplement (PMC3919634)
Supplement: NIHMS537456-supplement-3.pdf [file NIHMS537456-supplement-3.pdf]

**Supplementary Table 1. Clinicopathological phenotype of MCN-like lesions in elastase-tva, Ptf1a-cre, LSL-Kras<sup>G12D</sup> mice**

| No | ID#    | RCAS | TVA | Age    | Sex | Cyst size (mm) | Location  | Appearance   | Content         | Rupture |
|----|--------|------|-----|--------|-----|----------------|-----------|--------------|-----------------|---------|
| 1  | 857#1  | Wnt1 | +   | 6m 4d  | F   | 20x14x12       | Body      | Unilocular   | Hemorrhagic     | Present |
| 2  | 892#4  | Wnt1 | +   | 6m 5d  | F   | 30x25x18       | Tail      | Multilocular | Serosanguineous | Absent  |
| 3  | 962#3  | Wnt1 | +   | 6m 21d | F   | 20x15x12       | Tail      | Multilocular | Hemorrhagic     | Absent  |
| 4  | 893#3  | Wnt1 | +   | 8m     | F   | 30x25x22       | Head      | Multilocular | Hemorrhagic     | Absent  |
| 5  | 910#2  | Wnt1 | +   | 8m 1d  | F   | 30x35x24       | Tail      | Unilocular   | Serous          | Absent  |
| 6  | 1045#1 | Wnt1 | +   | 9m     | F   | 12x10x11       | Tail      | Multilocular | Hemorrhagic     | Absent  |
| 7  | 1045#3 | Wnt1 | +   | 9m     | F   | 30x25x7        | Tail      | Unilocular   | Serosanguineous | Absent  |
| 8  | 857#3  | Wnt1 | +   | 9m 29d | F   | 28x20x26       | Body      | Multilocular | Hemorrhagic     | Absent  |
| 9  | 979#1  | GFP  | +   | 4m 29d | F   | 22x5x5         | Body      | Unilocular   | Serous          | Absent  |
| 10 | 547#3  | GFP  | +   | 5m 26d | F   | 33x34x27       | Body-Tail | Multilocular | Hemorrhagic     | Absent  |
| 11 | 1000#2 | GFP  | +   | 11m 9d | F   | 15 in diameter | Tail      | Unilocular   | Serosanguineous | Absent  |
| 12 | 911#2  | Wnt1 | -   | 18m    | F   | 15x17x10       | Tail      | Unilocular   | Serous          | Absent  |
