# Supplementary material
Source: PubMed Central journal article supplement (PMC3919634)
Supplement: NIHMS537456-supplement-4.pdf [file NIHMS537456-supplement-4.pdf]

Supplementary Table 2. Immunohistochemical phenotype in mouse pancreas cyst lesions

| No | RCAS      | ID     | TVA | Cyst epithelium * |    |      |       |      |      |      |      |      |      |           |       |       |         |         |        |        |
|----|-----------|--------|-----|-------------------|----|------|-------|------|------|------|------|------|------|-----------|-------|-------|---------|---------|--------|--------|
|    |           |        |     | ER                | PR | αSMA | Pdx-1 | Hes1 | Wnt1 | FZD1 | FZD3 | FZD4 | FZD6 | β-catenin | Axin2 | p-JNK | p-Rock2 | p-Smad2 | Smad4  | NFATc1 |
| 1  | Wnt1      | 857#1  | +   | -                 | -  | -    | +     | +    | +    | ±    | +, f | -    | ±    | +, m      | +     | +, f  | -       | +, f    | +, n/c | -      |
| 2  | Wnt1      | 892#4  | +   | -                 | -  | -    | +     | +    | +    | ±    | +, f | -    | ±    | +, m      | +, f  | +     | -       | +, f    | +, n/c | -      |
| 3  | Wnt1      | 962#3  | +   | -                 | -  | -    | +     | +    | +    | ±    | +, f | -    | ±    | +, m      | +     | +     | -       | +, f    | +, n/c | -      |
| 4  | Wnt1      | 893#3  | +   | -                 | -  | -    | +     | +    | +    | ±    | +, f | -    | -    | +, m      | ±, f  | +, f  | -       | -       | +, n/c | -      |
| 5  | Wnt1      | 910#2  | +   | -                 | -  | -    | +     | +    | +    | +, f | +, f | -    | +, f | +, m      | ±     | +, f  | -       | +, f    | +, n/c | -      |
| 6  | Wnt1      | 1045#1 | +   | -                 | -  | -    | +     | +    | +    | ±    | +, f | -    | ±    | +, m      | ±, f  | +, f  | -       | +, f    | +, n/c | -      |
| 7  | Wnt1      | 1045#3 | +   | -                 | -  | -    | +     | +    | +    | +, f | +, f | -    | ±    | +, m      | +     | +     | -       | +, f    | +, n/c | -      |
| 8  | Wnt1      | 857#3  | +   | -                 | -  | -    | +     | +    | +    | ±    | +, f | -    | +, f | +, m      | +     | +     | -       | +, f    | +, n/c | -      |
| 9  | Wnt1      | 911#2  | -   | -                 | -  | -    | +     | NP   | +    | +, f | +, f | -    | ±    | +, m      | NP    | +     | -       | +       | NP     | -      |
| 10 | β-catenin | 896#2  | +   | -                 | -  | -    | +     | NP   | ±, f | ±    | +, f | -    | ±    | +, m      | NP    | +, f  | -       | +, f    | NP     | -      |
| 11 | GFP       | 979#1  | +   | -                 | -  | -    | +     | NP   | ±    | ±    | +, f | -    | -    | +, m      | NP    | +     | -       | +       | NP     | -      |
| 12 | GFP       | 547#3  | +   | -                 | -  | -    | +     | NP   | ±    | ±    | +, f | -    | -    | +, m      | NP    | -     | -       | +, f    | NP     | -      |
| 13 | GFP       | 1000#2 | +   | -                 | -  | -    | +     | NP   | +    | ±    | +, f | -    | ±    | +, m      | NP    | +, f  | -       | +, f    | NP     | -      |

| No | RCAS      | ID     | TVA | Ovarian-like stroma * |    |      |       |      |      |      |      |      |      |           |       |       |         |         |           |        |
|----|-----------|--------|-----|-----------------------|----|------|-------|------|------|------|------|------|------|-----------|-------|-------|---------|---------|-----------|--------|
|    |           |        |     | ER                    | PR | αSMA | Pdx-1 | Hes1 | Wnt1 | FZD1 | FZD3 | FZD4 | FZD6 | β-catenin | Axin2 | p-JNK | p-Rock2 | p-Smad2 | Smad4     | NFATc1 |
| 1  | Wnt1      | 857#1  | +   | +                     | -  | +    | -     | +    | ±    | +, f | +    | -    | -    | +, f, n   | ±, f  | +     | +, f    | +       | +, n/c    | -      |
| 2  | Wnt1      | 892#4  | +   | +                     | -  | +    | -     | +    | ±    | ±    | +    | -    | -    | +, f, n   | ±, f  | +     | +, f    | +       | +, n/c, f | -      |
| 3  | Wnt1      | 962#3  | +   | +                     | +  | +    | -     | +    | ±    | +, f | +    | -    | ±    | +, f, n   | ±, f  | +     | +, f    | +       | +, n/c    | -      |
| 4  | Wnt1      | 893#3  | +   | +, f                  | -  | +, f | -     | +    | ±    | ±    | +    | -    | -    | ±, f, n   | ±, f  | +     | +, f    | +, f    | +, n/c    | -      |
| 5  | Wnt1      | 910#2  | +   | +                     | -  | +    | -     | +    | ±    | +, f | +    | -    | -    | +, f, n   | +, f  | +     | +, f    | +       | +, n/c    | -      |
| 6  | Wnt1      | 1045#1 | +   | +                     | +  | +    | -     | +    | ±    | ±    | +    | -    | +, f | +, n      | +, f  | +     | +, f    | +       | +, n/c    | -      |
| 7  | Wnt1      | 1045#3 | +   | +                     | +  | +    | -     | +    | ±    | +, f | +    | -    | +, f | +, f, n   | +, f  | +     | +, f    | +       | +, n/c    | -      |
| 8  | Wnt1      | 857#3  | +   | +                     | +  | +    | -     | +    | ±    | +, f | +    | ±    | +, f | +, n      | ±, f  | +     | +, f    | +       | +, n/c    | -      |
| 9  | Wnt1      | 911#2  | -   | +                     | +  | +    | -     | NP   | ±    | +, f | +    | ±    | +, f | +, f, n   | NP    | +     | +, f    | +       | NP        | -      |
| 10 | β-catenin | 896#2  | +   | -                     | -  | -    | -     | NP   | -    | ±    | +    | -    | -    | -         | NP    | ±     | -       | +, f    | NP        | -      |
| 11 | GFP       | 979#1  | +   | +                     | -  | +    | -     | NP   | -    | ±    | ±    | -    | -    | +, f, n   | NP    | +     | ±       | +       | NP        | -      |
| 12 | GFP       | 547#3  | +   | -                     | -  | -    | -     | NP   | -    | ±    | ±    | -    | -    | -         | NP    | -     | -       | +, f    | NP        | -      |
| 13 | GFP       | 1000#2 | +   | +                     | +  | +    | -     | NP   | ±    | +, f | +    | ±    | ±    | +, f, n   | NP    | +     | +, f    | +       | NP        | -      |

\* ER, estrogen receptor; PR, progesterone receptor; αSMA, alpha smooth muscle actin; FZD, Frizzled; m, membranous; c, cytoplasmic; n, nuclear; f, focal immunoreactivities; ND, not determined; NP, not performed

\*\*, including incidental pancreatic ductal adenocarcinoma (PDAC)
