# Supplementary material
Source: PubMed Central journal article supplement (PMC3919634)
Supplement: NIHMS537456-supplement-5.pdf [file NIHMS537456-supplement-5.pdf]

**Supplementary Table 3. Immunohistochemical phenotype in human mucinous cystic neoplasm (MCN).**

| Cyst epithelium * |      |           |      |      |      |      |       |         |         |
|-------------------|------|-----------|------|------|------|------|-------|---------|---------|
| No                | Wnt1 | β-catenin | FZD1 | FZD4 | FZD3 | FZD6 | p-JNK | p-Smad2 | p-Rock2 |
| 1                 | +, f | +, m, c   | ±, f | -    | +/-  | -    | +/-   | +       | +       |
| 2                 | +    | +, m, c   | +/-  | -    | +/-  | -    | +/-   | +       | +       |
| 3                 | -    | +, m, c   | ±, f | -    | -    | -    | +/-   | +       | +       |
| 4                 | +, f | +, m      | -    | -    | +, f | -    | +/-   | +       | +       |
| 5                 | ±    | +, m      | ±, f | -    | -    | -    | +/-   | +       | +       |
| 6                 | -    | +, m      | -    | -    | -    | -    | +/-   | +       | +/-     |
| 7                 | +, f | +, m      | ±, f | -    | -    | -    | +/-   | +       | +, f    |
| 8                 | -    | +, m      | -    | -    | +/-  | -    | +/-   | +       | +       |

  

| Ovarian-like stroma * |      |           |      |      |      |      |       |         |         |
|-----------------------|------|-----------|------|------|------|------|-------|---------|---------|
| No                    | Wnt1 | β-catenin | FZD1 | FZD4 | FZD3 | FZD6 | p-JNK | p-Smad2 | p-Rock2 |
| 1                     | +    | +, f, c   | -    | -    | +, f | ±, f | +/-   | +       | +       |
| 2                     | +    | +, n, c   | -    | -    | -    | ±, f | +/-   | +       | +       |
| 3                     | +    | +, n, c   | -    | -    | +, f | ±, f | +/-   | +       | +, f    |
| 4                     | +, f | +, n, c   | -    | -    | +, f | -    | +     | +       | +       |
| 5                     | +    | +, f, n   | -    | -    | -    | -    | +     | +       | +       |
| 6                     | +    | +, f, n   | -    | -    | +    | -    | +     | +       | +       |
| 7                     | +    | +, f, n   | -    | -    | +, f | -    | +     | +       | +, f    |
| 8                     | +    | +, n      | -    | -    | +/-  | ±, f | +     | +       | +       |

\*, f, focal; m, membranous; c, cytoplasmic; n, nuclear immunoreactivities
